# Supplementary material for: Bovine Neonatal Pancytopenia-Associated Alloantibodies Recognize Individual Bovine Leukocyte Antigen 1 Alleles
Source: PubMed Central journal article supplement (PMC6102493; doi:10.3389/fimmu.2018.01902), 2018-08-14
Supplement: data_sheet_2.pdf [file data_sheet_2.pdf]

## Supplementary Figure S2

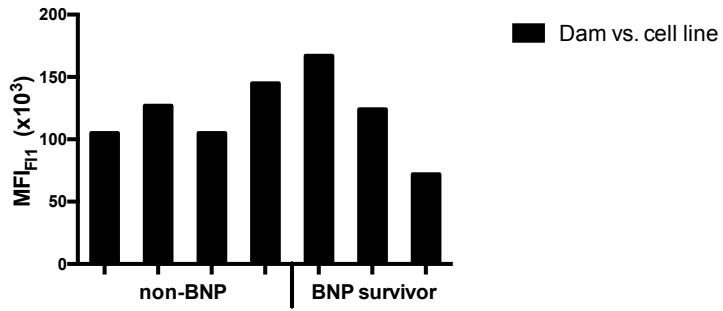

Serum reactivity to the production cell line was determined by flow cytometry for four Non-BNP and three BNP dams that were studied in Fig 7B.
